# Supplementary material
Source: HighWire-hosted journal article supplement (doi:10.1101/rna.056077.116)
Supplement: Supplemental_Figure_Legend_1.docx [file Supplemental_Figure_Legend_1.docx]

**Supplemental Figure 1: In vitro transcription of pre-let-7 RNA.**

Pre-let-7a was transcribed as a ribozyme-fusion RNA, which self-cleaves after transcription. The band corresponding to 72 base pre-let-7a was excised from the gel, purified and a single band was observed in a denaturing polyacrylamide gel electrophoresis after purification.
